# Supplementary material for: Systematic Review on Individualized Versus Standardized Parenteral Nutrition in Preterm Infants
Source: MDPI journal article supplement (doi:10.3390/nu15051224), 2023-02-28
Supplement: s1 [file s1]

Table S2: Table of clinical trials already included in the 2018 review

| Study                                                                 | Population                                                           | Intervention                                                                                                                                                                                                                                       | Comparison                                                                                                                                                                       | Outcomes                                                                                                                                              | Comments                                  |
|-----------------------------------------------------------------------|----------------------------------------------------------------------|----------------------------------------------------------------------------------------------------------------------------------------------------------------------------------------------------------------------------------------------------|----------------------------------------------------------------------------------------------------------------------------------------------------------------------------------|-------------------------------------------------------------------------------------------------------------------------------------------------------|-------------------------------------------|
| LoE 1+/: High quality RCTs or systematic reviews of high quality RCTs |                                                                      |                                                                                                                                                                                                                                                    |                                                                                                                                                                                  |                                                                                                                                                       |                                           |
| none                                                                  |                                                                      |                                                                                                                                                                                                                                                    |                                                                                                                                                                                  |                                                                                                                                                       |                                           |
| Level 1-: Low quality RCTs or systematic reviews of all RCTs          |                                                                      |                                                                                                                                                                                                                                                    |                                                                                                                                                                                  |                                                                                                                                                       |                                           |
| Level 2+: Nonrandomized, contemporaneous controls                     |                                                                      |                                                                                                                                                                                                                                                    |                                                                                                                                                                                  |                                                                                                                                                       |                                           |
| Dice <sup>1</sup> 1981                                                | N=28<br>Mean BW: 1109g (SD 211.37)<br>Mean GA: 31 weeks (SD 1.52)    | SPN (n=14)<br>Solutions prepared in the pharmacy, physicians were allowed to make essential glucose and electrolyte manipulations. Standard solutions were available as either 10% or 13% dextrose.                                                | IPN (n=14)<br>Individual requirements were determined by the physician and pharmacist.                                                                                           | Weight gain<br>Protein intake<br>Non-protein calorie intake                                                                                           | Babies assigned to SPN or IPN alternately |
| LOE 2-: Nonrandomized, historical controls                            |                                                                      |                                                                                                                                                                                                                                                    |                                                                                                                                                                                  |                                                                                                                                                       |                                           |
| Iacobelli. 2010 <sup>2</sup><br>France                                | N = 107<br>Mean BW: 1175g (SD 333.48)<br>Mean GA: 29 weeks (SD 1.77) | SPN (n=67)<br>Designed to provide identical initial dosage and proportional increase as indicated by the written protocol of the unit. Solutions were commercially batch-produced following criteria of Fasonut Laboratories (Montpellier, France) | IPN (n= 40)<br>Prescriptions were developed using a computer system which calculated nutrient volumes according to data entered by the physician                                 | Weight loss<br>Sepsis<br>NEC<br>Amino acid intake<br>Glucose intake<br>Lipid intake<br>Energy intake                                                  | Study conducted over 2 time periods       |
| Smolkin <sup>3</sup><br>2010<br>Israel                                | N = 140<br>Mean BW: 1285g (SD 298.58)<br>Mean GA: 29 weeks (SD 1.83) | SPN (n=70)<br>Five pre-set formulations were available with various glucose concentrations (2.5, 5, 7.5, 10 and 11%) and AA concentrations ranging from 1.5 to                                                                                     | IPN (n=70)<br>A standard formula was started until tailored IPN became available (glucose 7.5-11%), which could be up to 48hours. IPN was adjusted daily for water, glucose, AA, | Weight gain<br>Weight at discharge<br>Head circumference<br>Duration of stay<br>Sepsis<br>Energy intake<br>Protein intake<br>Fat intake<br>Glc intake |                                           |

|                                         |                                                                                        |                                                                                                                                                                                                                                                                                                                  |                                                                                                                                                                                                                                                                                                  |                                                                                           |  |
|-----------------------------------------|----------------------------------------------------------------------------------------|------------------------------------------------------------------------------------------------------------------------------------------------------------------------------------------------------------------------------------------------------------------------------------------------------------------|--------------------------------------------------------------------------------------------------------------------------------------------------------------------------------------------------------------------------------------------------------------------------------------------------|-------------------------------------------------------------------------------------------|--|
|                                         |                                                                                        | 2g/100ml of PN.                                                                                                                                                                                                                                                                                                  | lipids, electrolytes, vitamins and trace elements.                                                                                                                                                                                                                                               |                                                                                           |  |
| Morgan <sup>4</sup><br>2009<br>UK       | N = 118<br>Mean BW: birth weight: 930g (SD 222.85)<br>Mean GA: 27 weeks (SD 1.51)<br>D | SPN (n=38)<br>The macronutrient content did not differ to the IPN.<br>The aqueous content was concentrated and the remaining fluid provided by dextrose. The aqueous solution had a standard electrolyte content with three different options: no electrolytes, maintenance electrolytes, and additional sodium. | IPN (n= 59)<br>The protocol aimed to start PN within 24 hours, starting at 1g/kg/day protein/lipid, increasing to 2g/kg/day for another 48 hours, with a maximum 3g/kg/day protein/lipid). Electrolyte content was individually prescribed, if deficiencies were identified the IPN was changed. | Calorie intake<br>Protein intake                                                          |  |
| Lenclen <sup>5</sup><br>2006<br>France  | N = 40<br>Mean GA: 28 weeks (SD 2.42)<br>Mean BW: 886g (SD 203.60)                     | SPN (n=20)<br>Prescription of PN was based on 3 solutions of predefined composition designed with reference to published evidence. Solutions were prepared in the hospital pharmacy.                                                                                                                             | IPN (n=20)<br>Individualized following recommendations of the unit, using a standard prescribing protocol. Solutions were prepared by the nurses in the department.                                                                                                                              | Weight gain<br>Duration of PN<br>Non-protein energy intake<br>AA intake<br>Glucose intake |  |
| Yeung <sup>6</sup><br>2003<br>Australia | N = 58<br>Mean BW:1101g (SD 293.47) Mean GA:28 weeks (SD 1.93)                         | SPN (n=27)<br>Formulations were batch produced as two solutions<br>Solution A: Glucose 125g/L, AA 24.5g/L, Sodium 8.0mmol/L<br>Solution B: Glucose 100g/L, AA 24.5g/L, Sodium 25mmol/L,:                                                                                                                         | IPN (n=31)<br>Formulations were determined according to the neonatologist's discretion, based on morning serum biochemical data                                                                                                                                                                  | Gluc intake<br>AA intake                                                                  |  |

## References

1. Dice JE, Burckart GJ, Woo JT, Helms RA. Standardized versus pharmacist-monitored individualized parenteral nutrition in low-birth-weight infants. *Am J Hosp Pharm.* 1981;38(10):1487-1489.
2. Iacobelli S, Bonsante F, Vintejoux A, Gouyon JB. Standardized parenteral nutrition in preterm infants: early impact on fluid and electrolyte balance. *Neonatology.* 2010;98(1):84-90.
3. Smolkin T, Diab G, Shohat I, et al. Standardized versus individualized parenteral nutrition in very low birth weight infants: a comparative study. *Neonatology.* 2010;98(2):170-178.
4. Morgan C, Badhawi I, Grime C, Herwitker S. Improving early protein intake for very preterm infants using a standardised concentrated parenteral nutrition formulation. *e-SPEN.* 2009;4:e324-328.
5. Lenclen R, Crauste-Manciet S, Narcy P, et al. Assessment of implementation of a standardized parenteral formulation for early nutritional support of very preterm infants. *Eur J Pediatr.* 2006;165(8):512-518.
6. Yeung MY, Smyth JP, Maheshwari R, Shah S. Evaluation of standardized versus individualized total parenteral nutrition regime for neonates less than 33 weeks gestation. *J Paediatr Child Health.* 2003;39(8):613-617.
